# Supplementary material for: Methylation-GC-MS/FID-Based Glycosidic Linkage Analysis of Unfractionated Polysaccharides in Red Seaweeds
Source: MDPI journal article supplement (doi:10.3390/md22050192), 2024-04-24
Supplement: s1 [file s1]

## Supporting documents

### Table of contents

| Contents                                                                                                      | Page  |
|---------------------------------------------------------------------------------------------------------------|-------|
| Supplemental tables for linkage analysis<br>( <b>Table S1-S3</b> )                                            | 2     |
| Supplemental GC-TIC and GC-FID chromatograms of PMAAs from<br>carbohydrate standards ( <b>Figure S1-S11</b> ) | 3-13  |
| Supplemental EI-MS spectra and ion fragmentation patterns<br>( <b>Figure S12-S15</b> )                        | 14-17 |
| Supplemental bubble plot of GC-MS-derived linkage compositions<br>( <b>Figure S16</b> )                       | 18    |
| R Script code for bubble plot                                                                                 | 19    |
| R Script code for PCR plot                                                                                    | 20-21 |

**Table S1.** Relative monosaccharide compositions (Mol%) of unfractionated polysaccharides of six red seaweed species quantified by GC-FID

| Monosaccharide | <i>Prionitis</i> | <i>Gracilariopsis</i> | <i>Callophyllis</i> | <i>Mastocarpus</i> | <i>Palmaria</i> | <i>Mazzaella</i> |
|----------------|------------------|-----------------------|---------------------|--------------------|-----------------|------------------|
| AnGal          | 12.7±0.2         | 27.3±0.9              | 18.1±0.2            | 34.1±0.6           | 0.2±0.0         | 17.7±4.3         |
| Ara            | 0.5±0.1          | 1.1±0.1               | 2.3±0.1             | 0.9±0.0            | 2.0±0.4         | 0.3±0.0          |
| Gal            | 71.6±3.0         | 54.1±2.0              | 54.1±1.8            | 59.0±0.1           | 11.6±0.8        | 72.7±4.8         |
| Glc            | 10.9±3.7         | 14.9±3.4              | 16.3±1.5            | 4.4±0.5            | 6.6±0.4         | 7.3±0.3          |
| Man            | 0.3±0.1          | 0.5±0.0               | 2.9±0.2             | 0.3±0.0            | 0.1±0.0         | 0.3±0.0          |
| Xyl            | 3.9±0.6          | 2.1±0.4               | 6.2±0.2             | 1.3±0.0            | 79.5±1.5        | 1.7±0.2          |

**Note:** AnGal, 3,6-anhydrogalactose; Ara, arabinose; Gal, galactose; Glc, glucose; Man, mannose; Xyl, xylose. Two separate experiments were conducted to generate averages and standard deviations.

**Table S2.** Estimated polysaccharide compositions (Mol%) from linkage compositions of six red seaweed species quantified GC-FID

| Polysaccharide | <i>Prionitis</i> | <i>Gracilariopsis</i> | <i>Callophyllis</i> | <i>Mastocarpus</i> | <i>Palmaria</i> | <i>Mazzaella</i> |
|----------------|------------------|-----------------------|---------------------|--------------------|-----------------|------------------|
| XN             | 1.5±0.9          | 1.2±0.2               | 4.5±0.2             | 0.4±0.0            | 72.8±1.0        | 0.3±0.0          |
| MN             | 0.1±0.0          | 0.4±0.0               | 1.3±0.0             | 0.2±0.0            | 0.0±0.0         | 0.1±0.0          |
| GN             | 84.3±3.2         | 81.4±2.9              | 72.3±1.6            | 93.1±0.5           | 11.7±0.8        | 90.4±0.5         |
| CE             | 8.5±3.1          | 10.2±1.8              | 12.7±0.9            | 1.8±0.2            | 4.0±0.2         | 3.3±1.1          |
| FS             | 2.0±0.4          | 4.4±1.4               | 3.0±0.5             | 1.5±0.1            | 0.9±0.4         | 3.1±0.3          |
| UA             | 3.6±0.5          | 2.4±0.2               | 6.2±0.0             | 3.0±0.1            | 10.7±0.4        | 2.7±0.3          |

**Note:** XN: xylans; MN: mannans; GN: galactans; CE: cellulose; FS: Floridean starch; UA: unassigned linkages. Two separate experiments were conducted to generate averages and standard deviations.

**Table S3.** Estimation of polysaccharide compositions based on linkage compositions

| Polysaccharide | Calculation                                                              |
|----------------|--------------------------------------------------------------------------|
| XN             | Sum of 3-Xylp and 4-Xylp                                                 |
| MN             | 4-Manp                                                                   |
| GN             | Sum of all Galp and AnGalp linkages                                      |
| FS             | Calculated based on 4,6-Glcp using an average degree of branching of 4.8 |
| CE             | Total 4-Glcp subtracted by 4-Glcp in FS                                  |
| UA             | All remaining linkages                                                   |

**Note:** XN: xylan; MN: mannan; GN: galactan; CE: cellulose; FS: Floridean starch; UA: unassigned linkages.

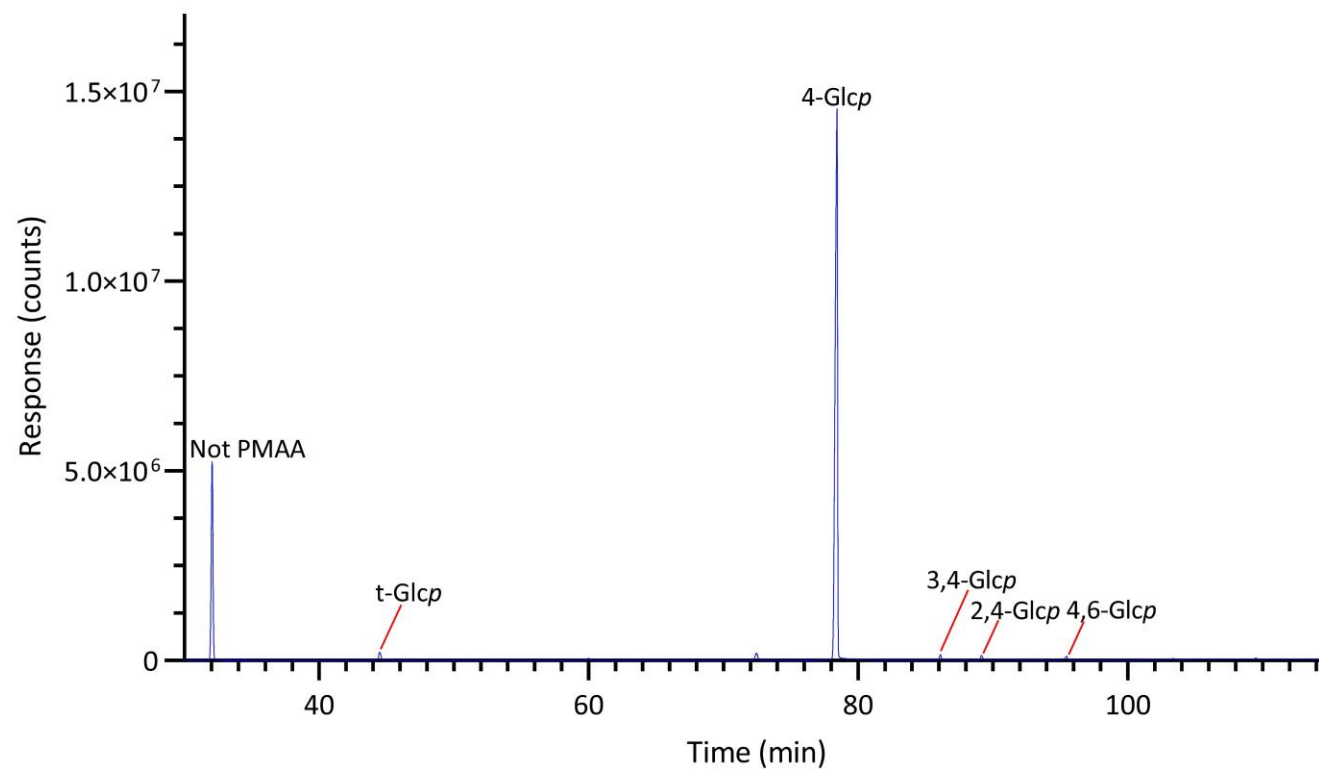

**Figure S1.** GC-TIC chromatogram of PMAA standards prepared from microcrystalline cellulose.

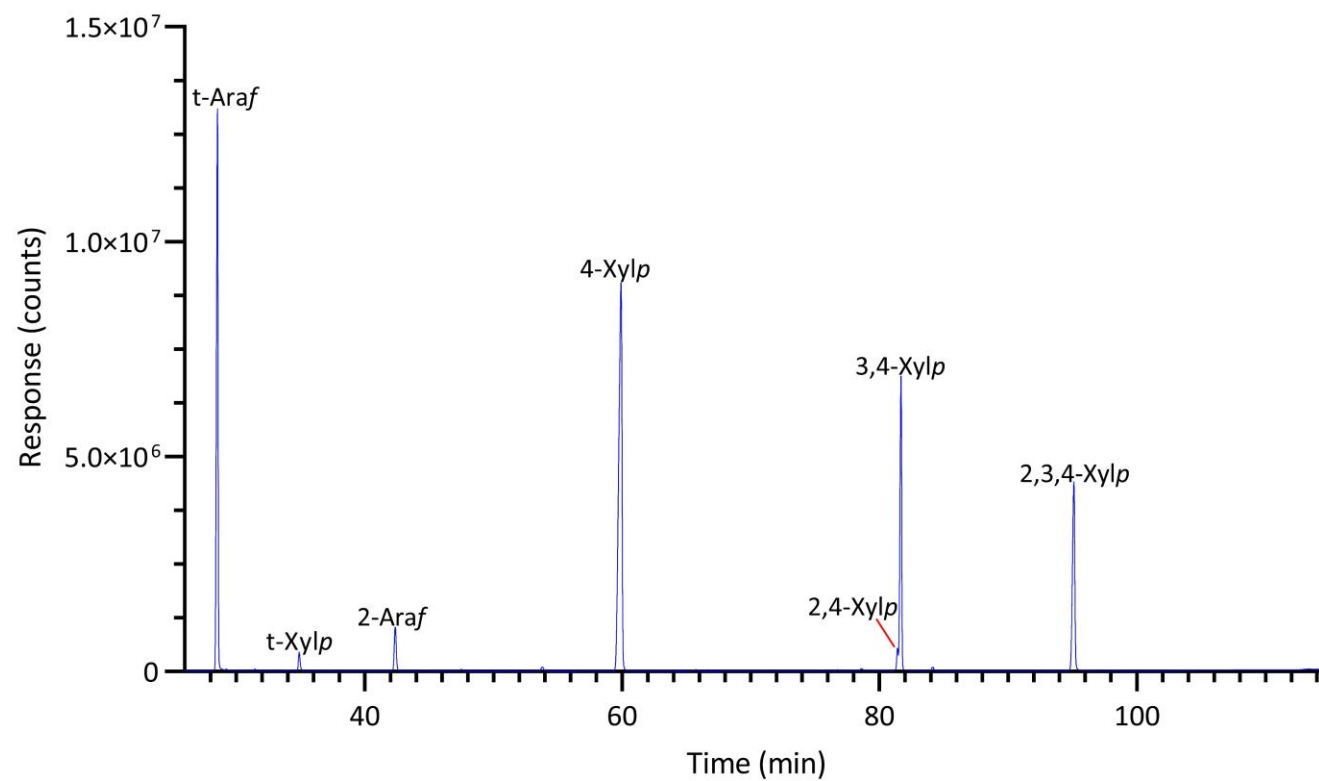

**Figure S2.** GC-TIC chromatogram of PMAA standards prepared from commercial arabinoxylan.

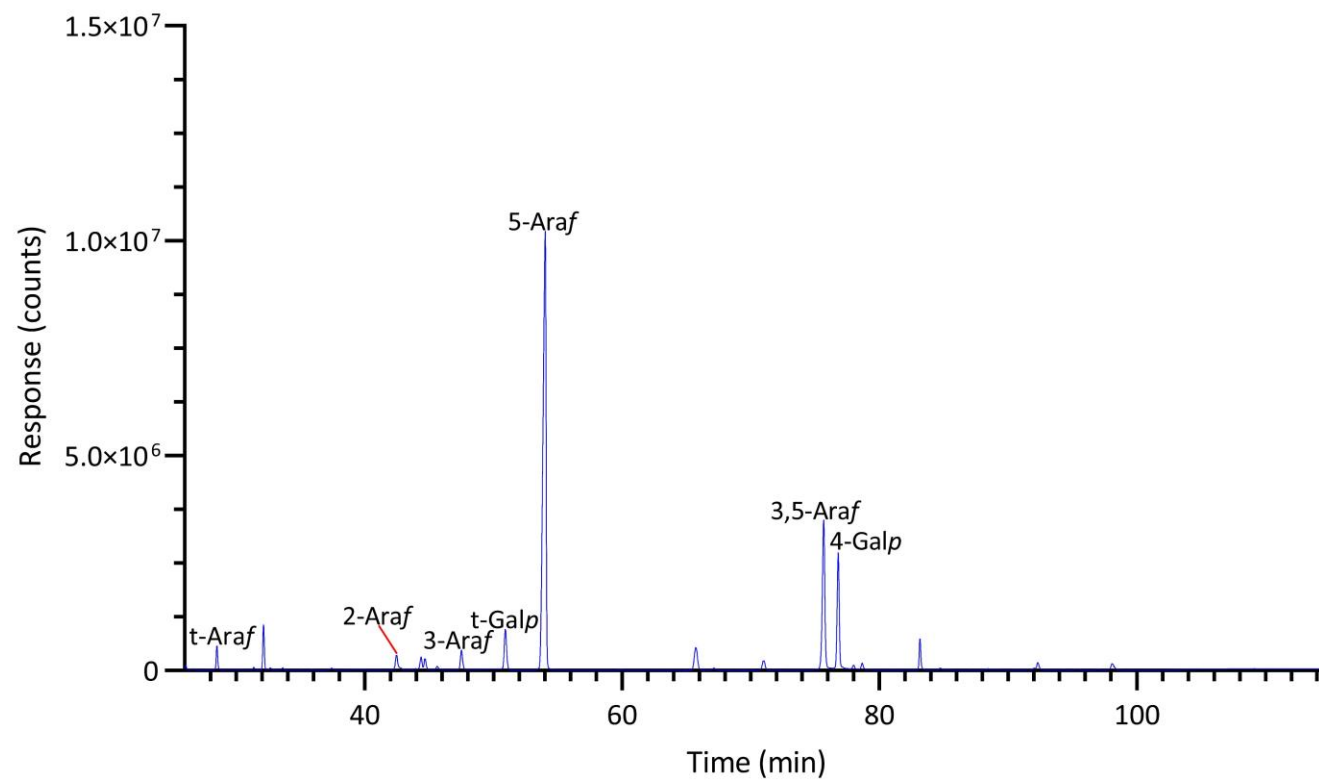

**Figure S3.** GC-TIC chromatogram of PMAA standards prepared from commercial debranched arabinan.

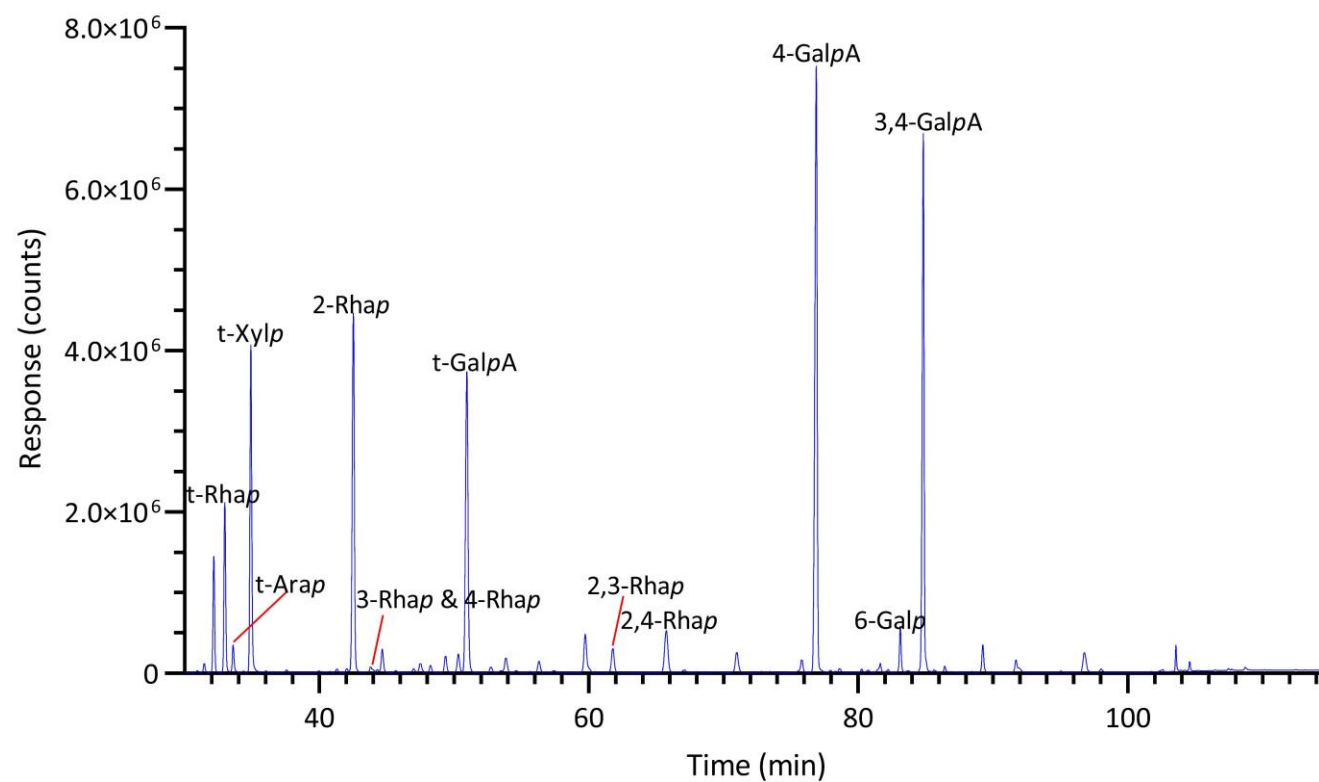

**Figure S4.** GC-TIC chromatogram of PMAA standards prepared from commercial rhamnogalacturonan I (RG-I)

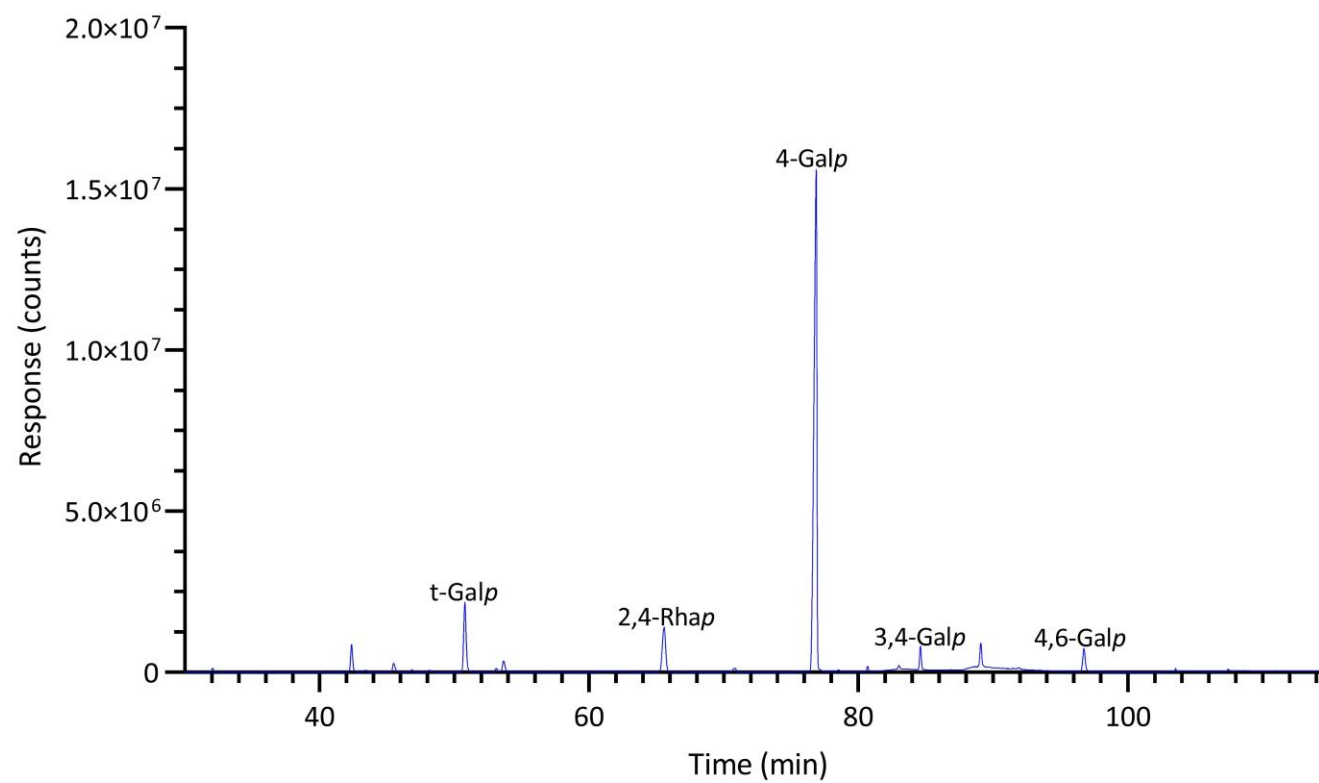

**Figure S5.** GC-TIC chromatogram of PMAA standards prepared from commercial potato galactan.

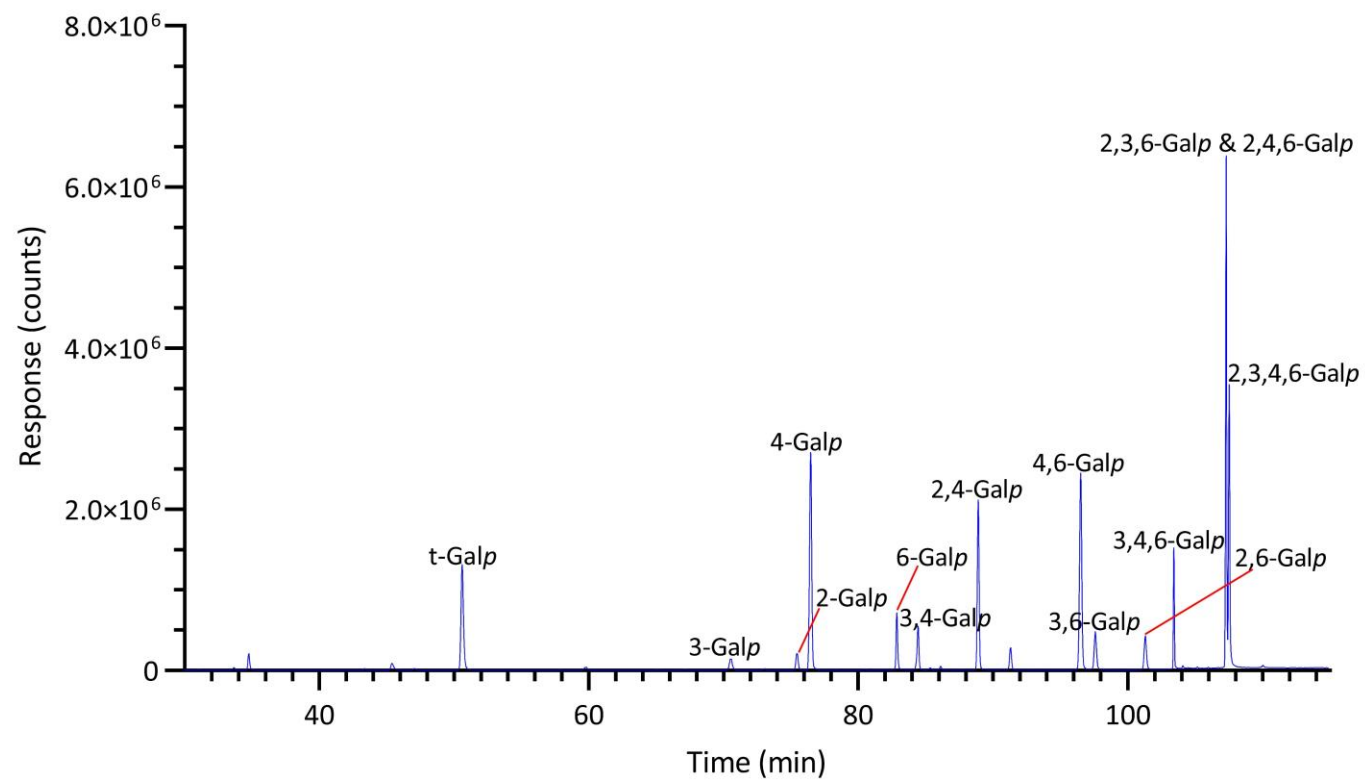

**Figure S6.** GC-TIC chromatogram of PMAA standards prepared by undermethylation of commercial 1-methyl galactopyranoside.



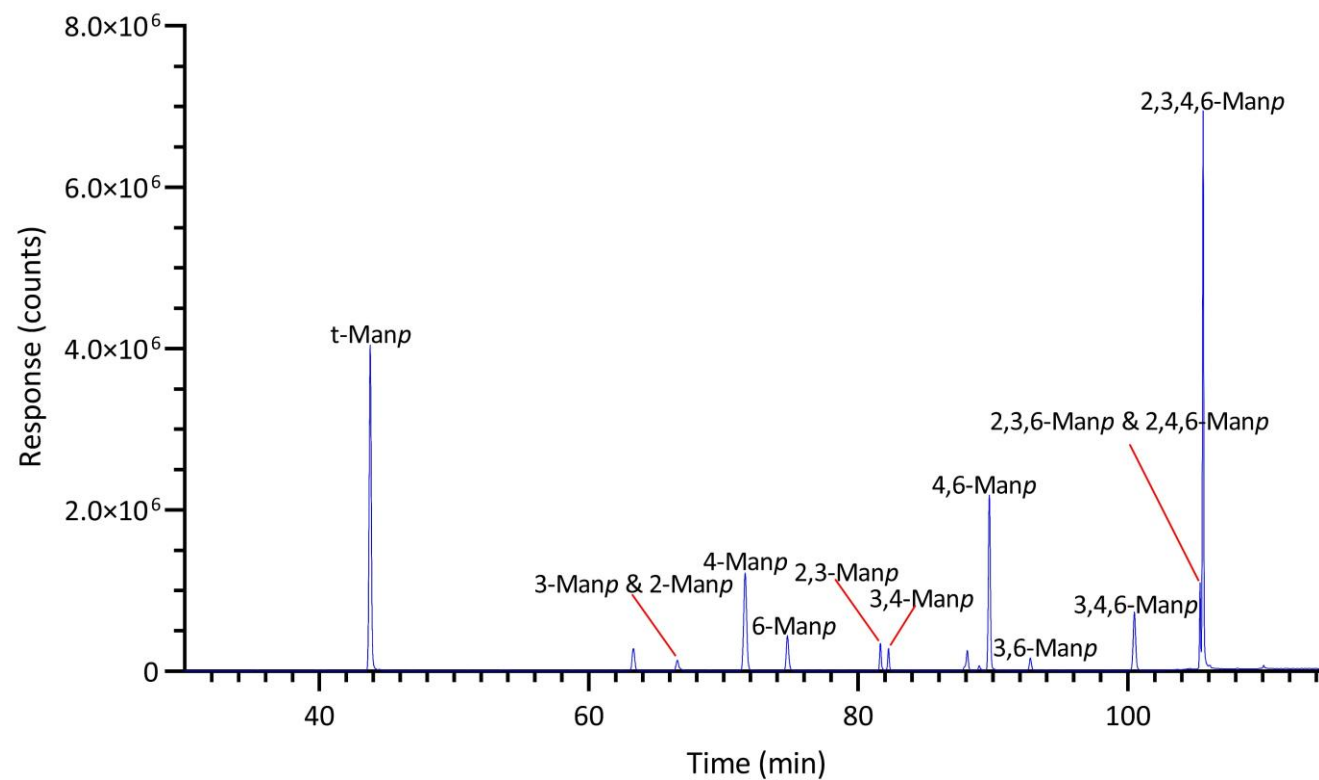

**Figure S7.** GC-TIC chromatogram of PMAA standards prepared by undermethylation of commercial 1-methyl mannopyranoside.

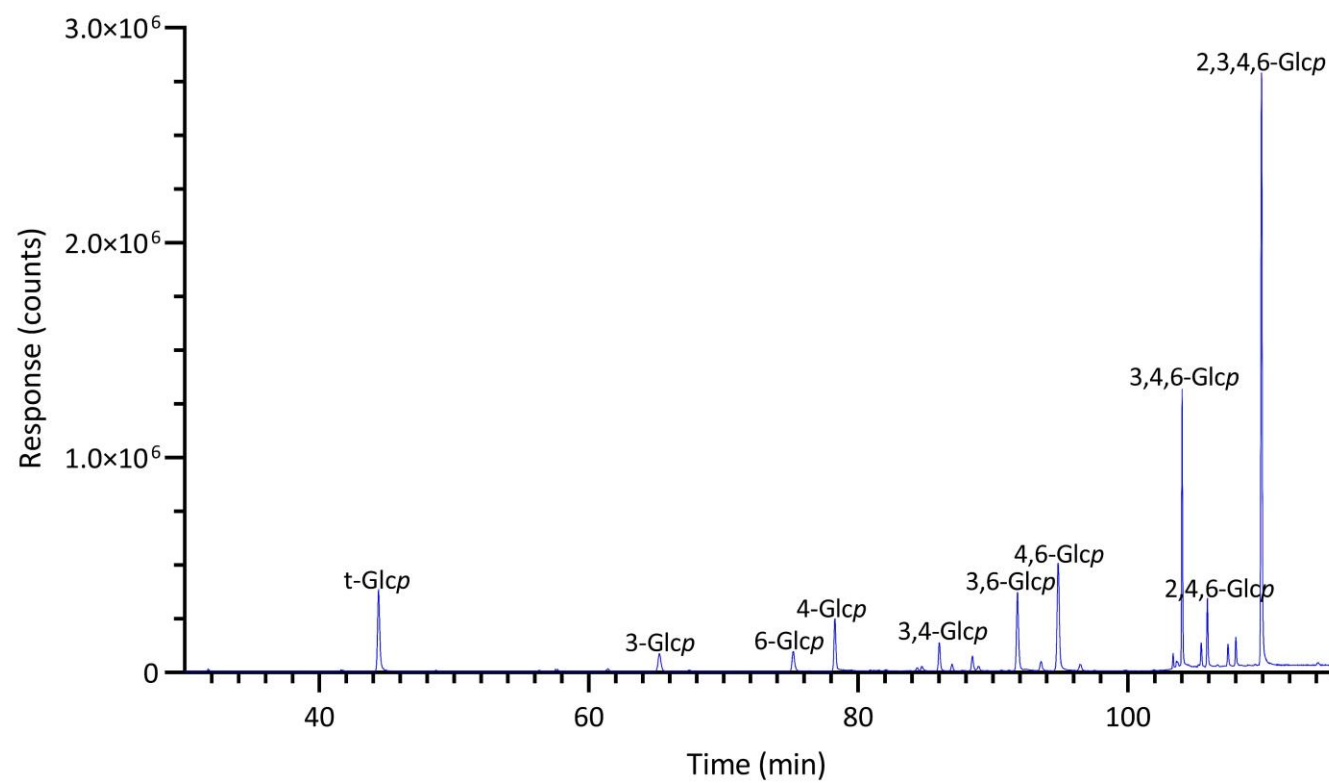

**Figure S8.** GC-TIC chromatogram of PMAA standards prepared by undermethylation of commercial 1-methyl glucopyranoside.

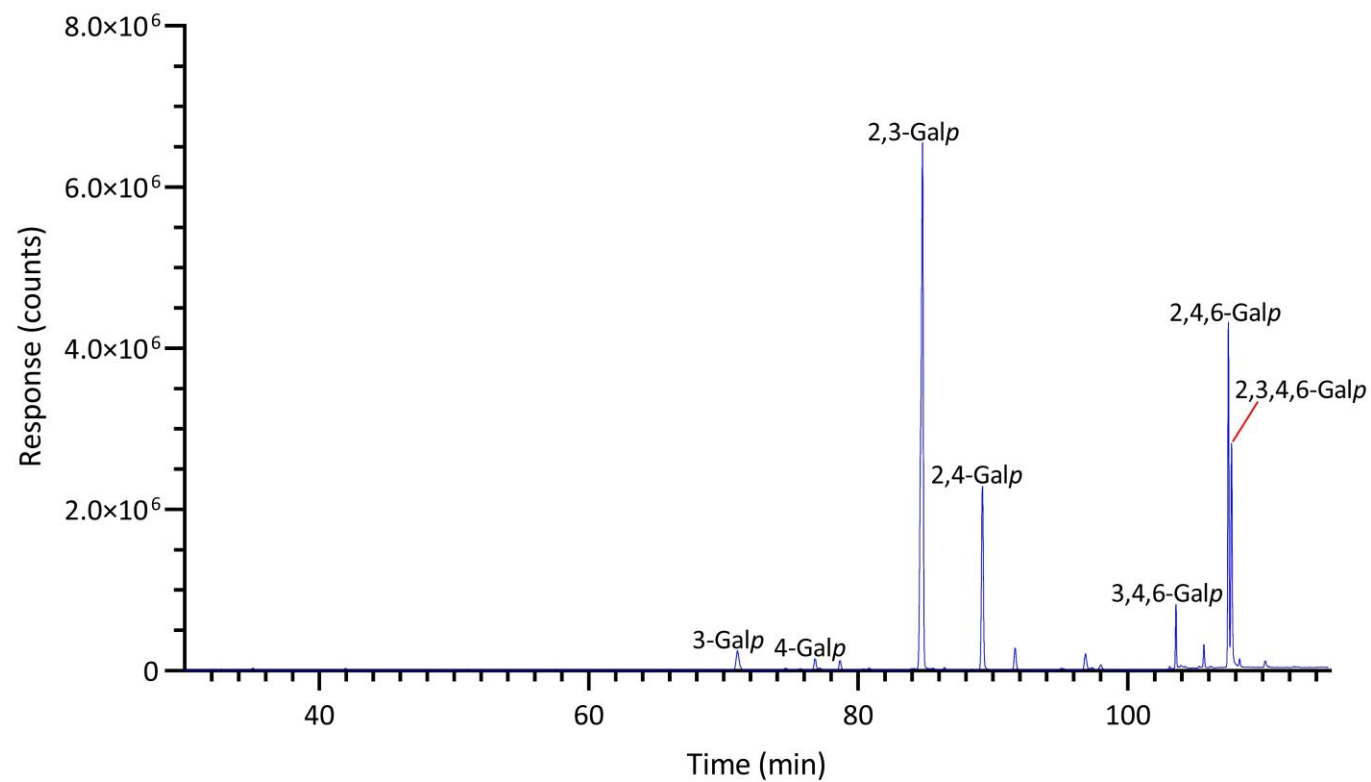

**Figure S9.** GC-TIC chromatogram of PMAA standards prepared from commercial  $\lambda$ -carrageenan undermethylated by one round of methylation.

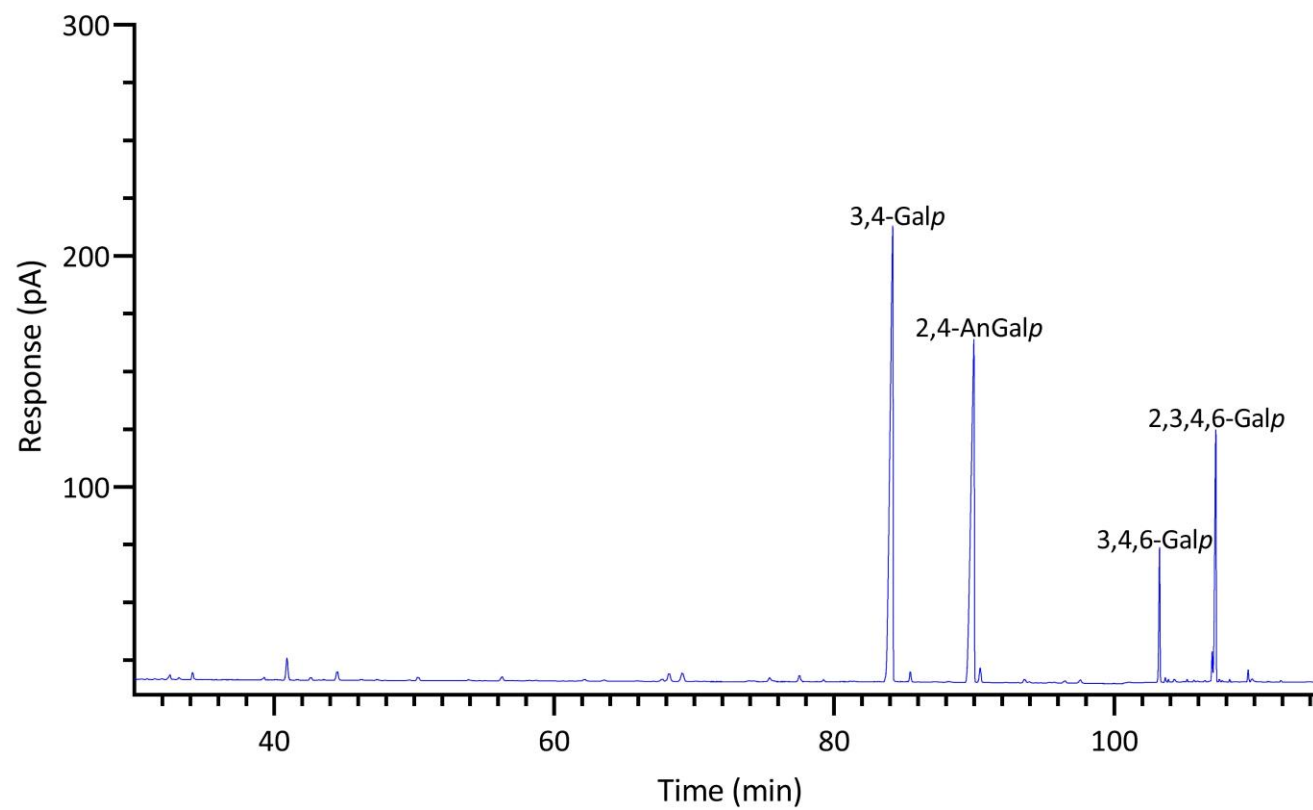

**Figure S10.** GC-FID chromatogram of PMAA standards prepared from commercial ι-carrageenan undermethylated by one round of methylation.

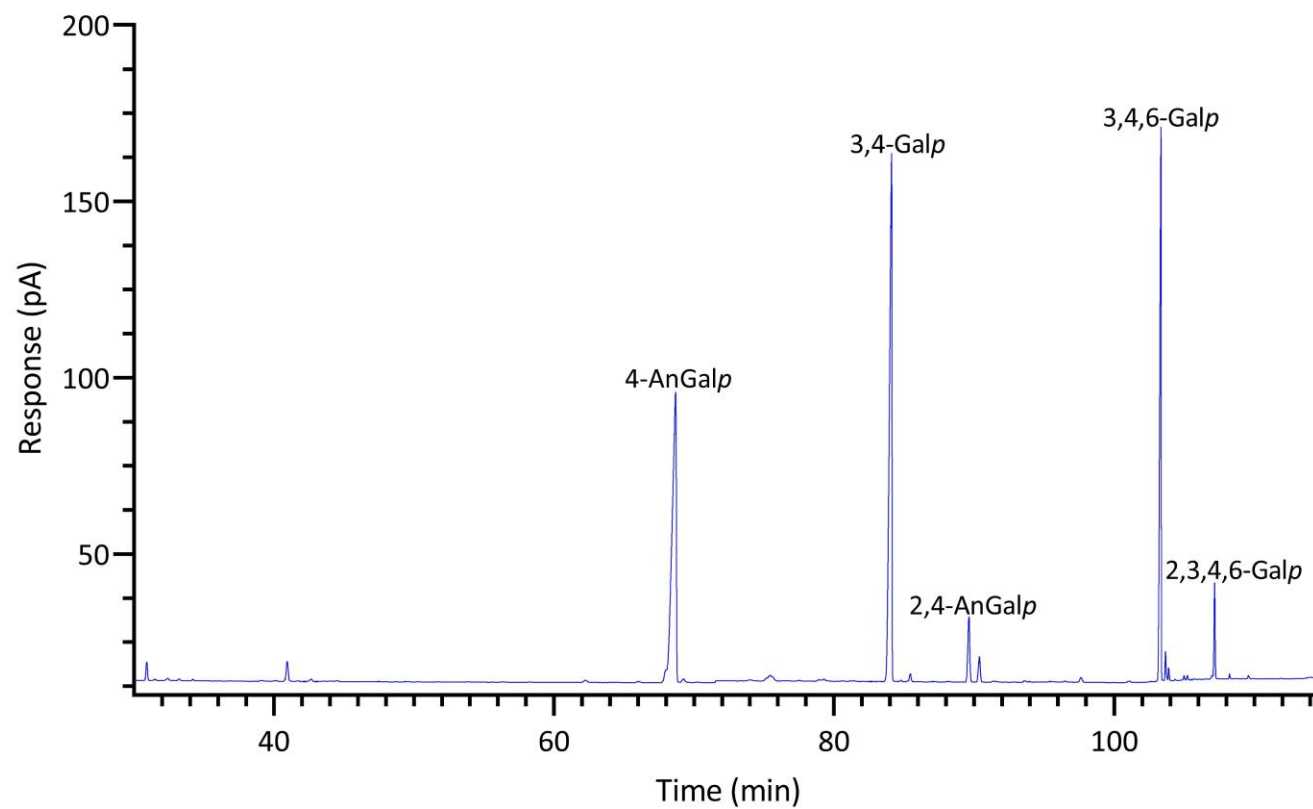

**Figure S11.** GC-FID chromatogram of PMAA standards prepared from commercial  $\kappa$ -carrageenan undermethylated by one round of methylation.

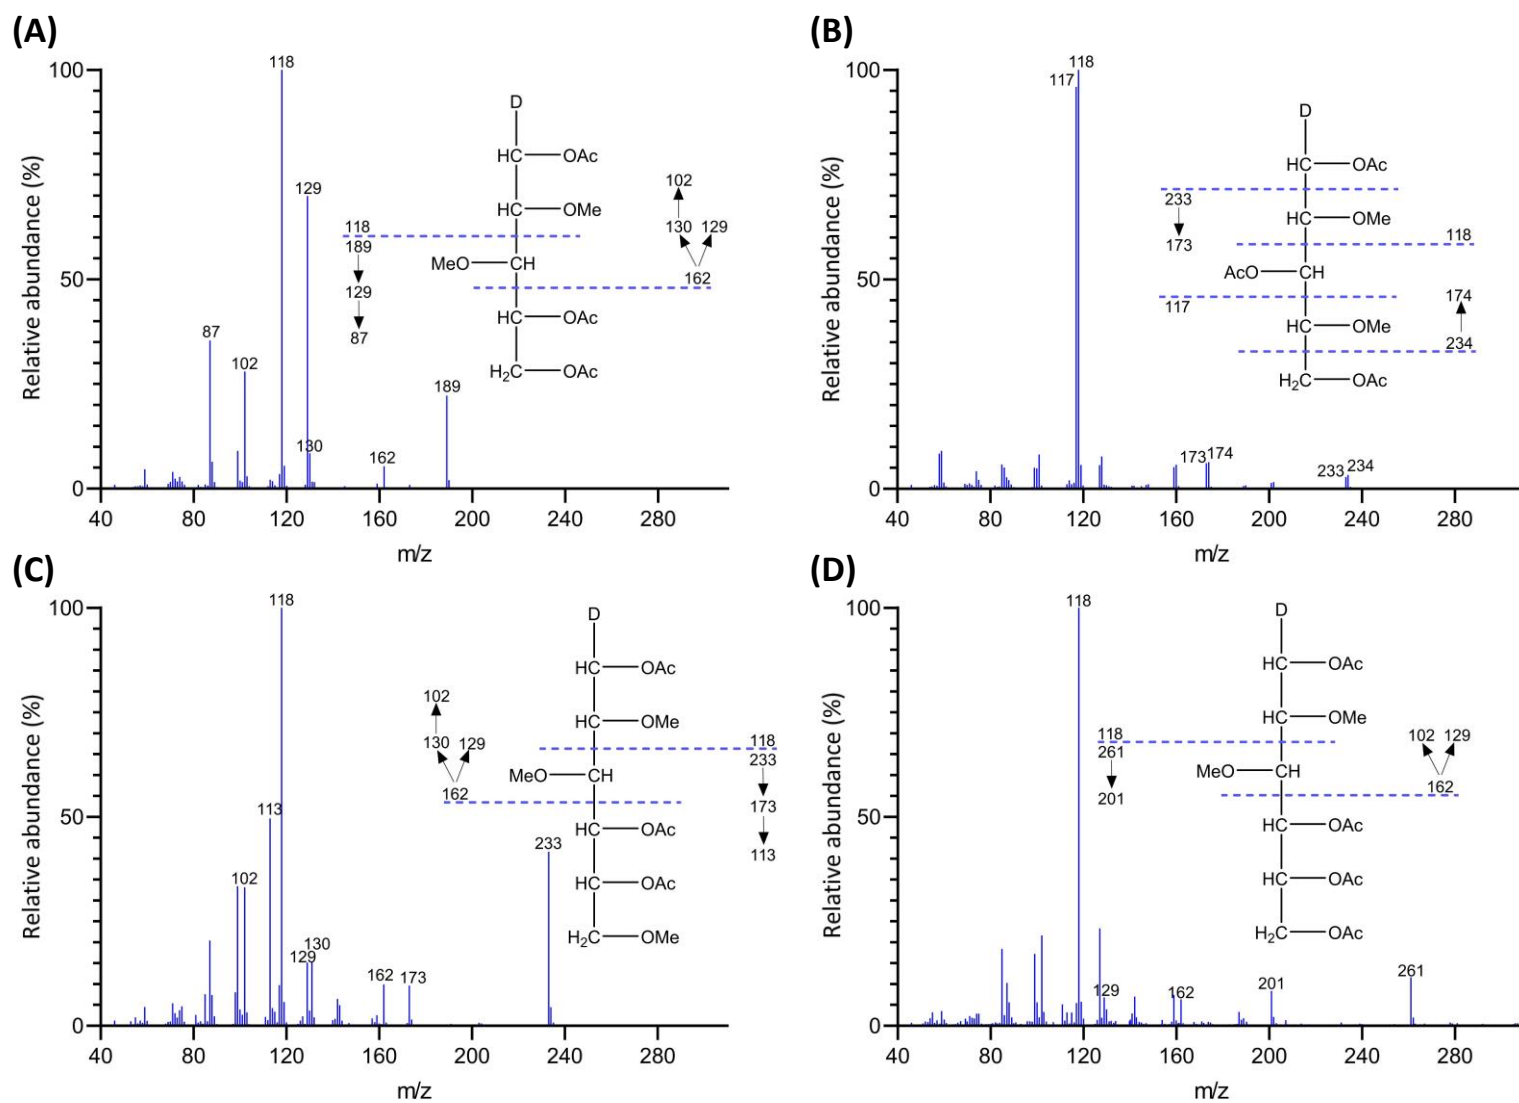

**Figure S12.** EI-MS spectra and ion fragmentation patterns of PMAAs from (A) 4-Xylp, (B) 3-Xylp, (C) 4-Glcp, and (D) 4,6-Glcp in *Palmaria palmata*.

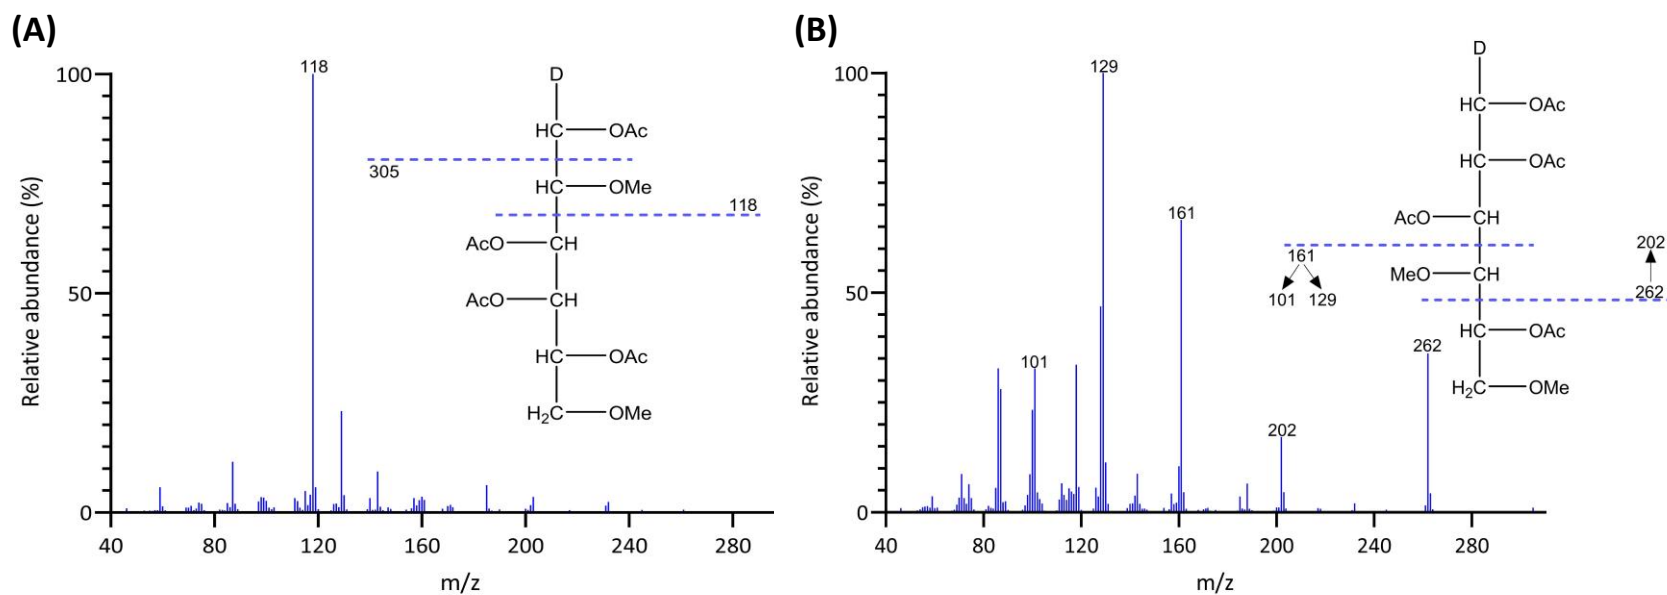

**Figure S13.** EI-MS spectra and ion fragmentation patterns of PMAAs from **(A)** 3,4-Galp and **(B)** 2,3-Galp.

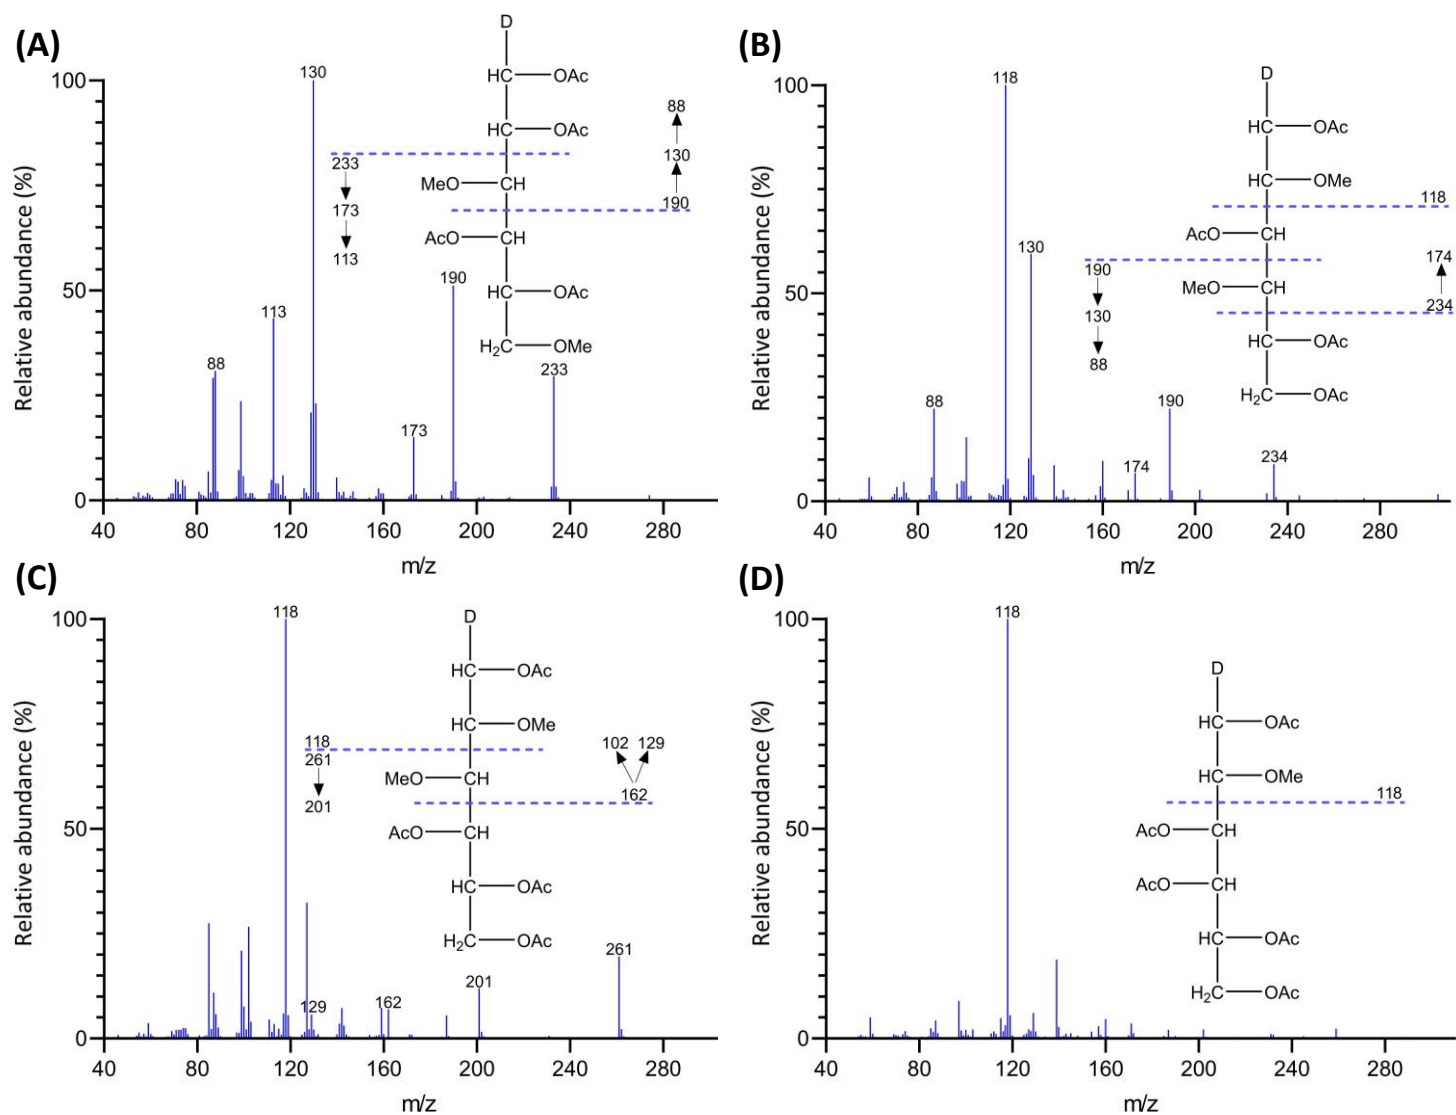

**Figure S14.** EI-MS spectra and ion fragmentation patterns of PMAAs from **(A)** 2,4-Galp, **(B)** 3,6-Galp, **(C)** 4,6-Galp, and **(D)** 3,4,6-Galp in *Callophyllis* sp.





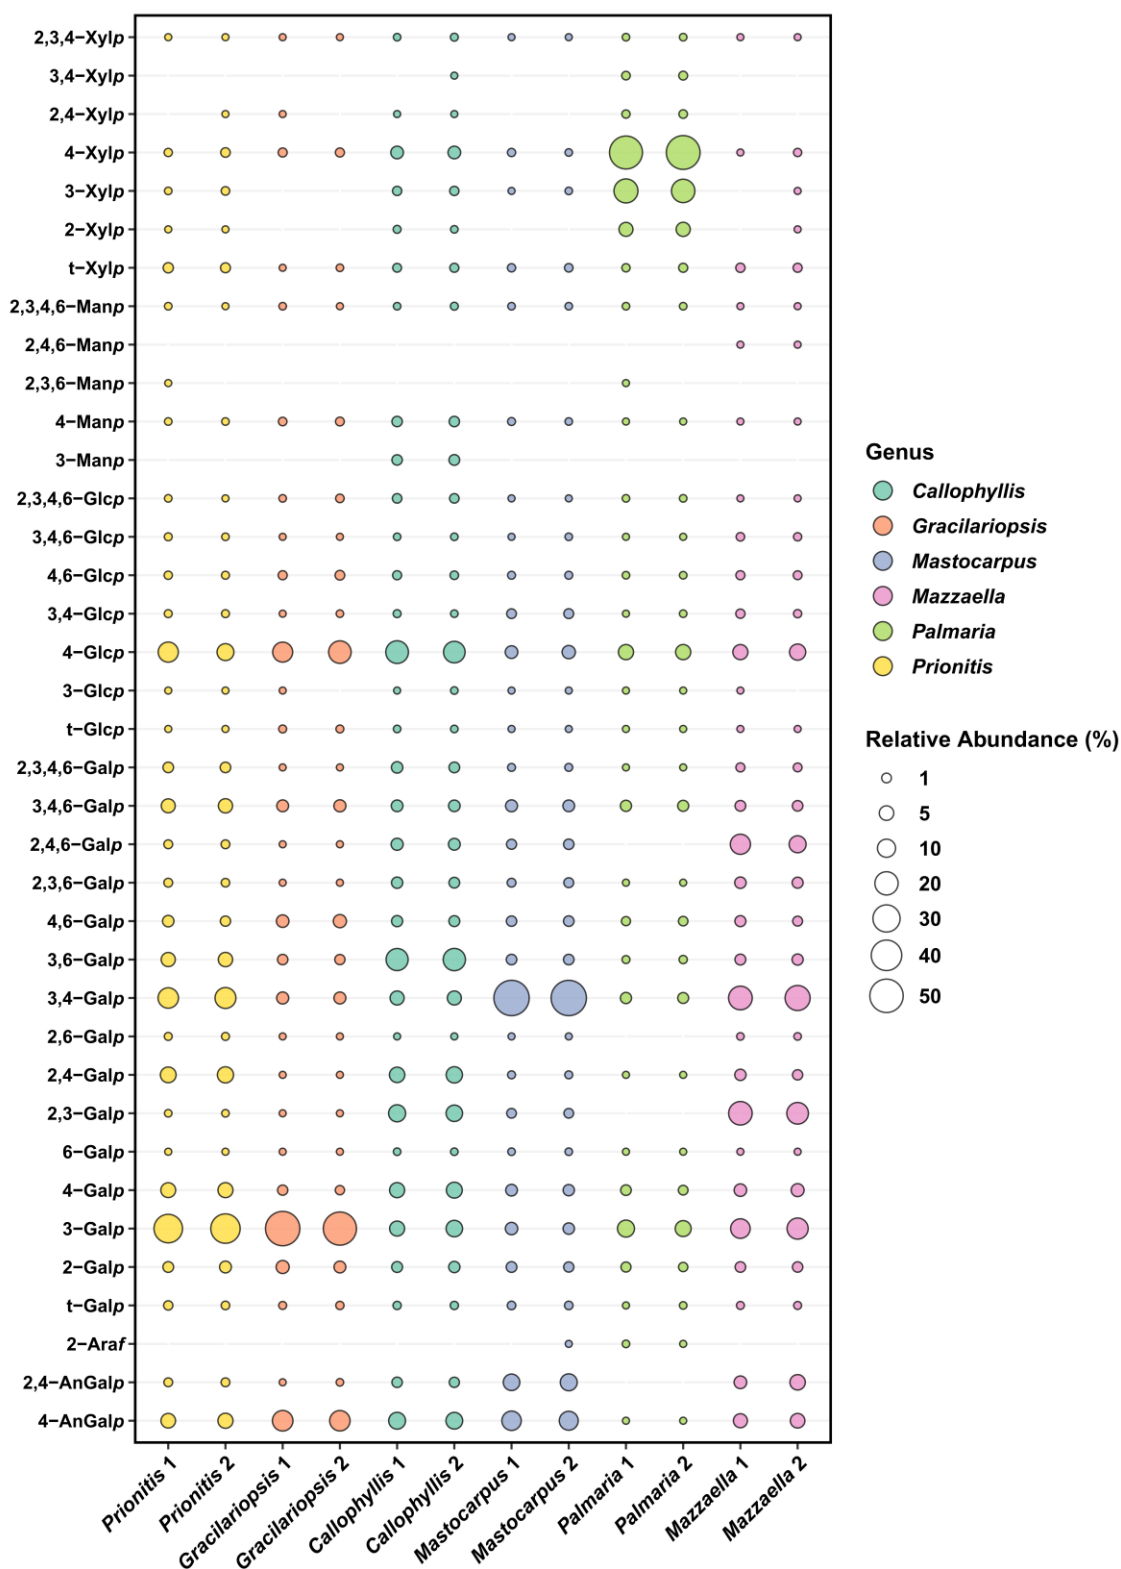

**Figure S16.** Bubble plot showing the relative linkage composition (Mol%) quantified by GC-MS from each of the two separate experiments conducted on unfractionated polysaccharides from six red seaweed species.

**R Script code for bubble plot:**

```

# Load required libraries
library(ggplot2) # For creating data visualizations
library(reshape2) # For data reshaping and transformation

# Insert the name of your CSV file here.
# Read data from the CSV file and prevent modification of column names
pc <- read.csv("File Name.csv", header = TRUE, check.names = FALSE)

# Melt the data to long format for ggplot2.
# Replace "Sample" and "Genus" in the entire script with the names of the first 2 columns of your CSV file.
# The 2nd column should be the treatment group, harvest year, disease state, etc.
pcm <- melt(pc, id = c("Sample", "Genus"))
pcm$Sample <- factor(pcm$Sample, levels = unique(pcm$Sample))

# Create the bubble plot
plot <- ggplot(pcm, aes(x = Sample, y = variable)) +
  geom_point(aes(size = value, fill = Genus), alpha = 0.75, shape = 21) +
  scale_size_continuous(limits = c(0.000001, 100), range = c(1, 10), breaks = c(1, 5, 10, 20, 30, 40, 50)) + #limits sets min
and max values for your data set, range sets size of bubbles
  labs(x = "", y = "", size = "Relative Abundance (%)", fill = "Genus") +
  theme(
    legend.key = element_blank(),
    axis.text.x = element_text(colour = "black", size = 10, face = "bold", angle = 45, vjust = 1, hjust = 1), # Adjust angle,
horizontal (hjust), and vertical alignment (vjust) of x-axis labels
    axis.text.y = element_text(colour = "black", face = "bold", size = 9),
    legend.text = element_text(size = 10, face = "bold", colour = "black"),
    legend.title = element_text(size = 11, face = "bold"),
    panel.background = element_blank(),
    panel.border = element_rect(colour = "black", fill = NA, size = 1.2),
    legend.position = "right",
    panel.grid.major.y = element_line(colour = "grey95")
  ) +
  guides(fill = guide_legend(override.aes = list(size = 4)))+ # Set size of upper legend labels
  scale_fill_brewer(palette = "Set2") # Use the Set2 color palette for the bubbles

#Display the plot on RStudio
print(plot)

#Set output file name and save the bubble plot as a PDF or PNG image and change the size of the image
ggsave("File Name.pdf", plot = plot, width = 8, height = 11, units = "in", dpi = 1200)

```

**R Script code for PCA score plot:**

```

# Load required libraries
library(dplyr) # For data manipulation
library(forcats) # For further data manipulation
library(ggplot2) # For plotting

# Insert the name of your file here
data <- read.csv("File Name.csv")

# Perform principal component analysis (PCA), scale=true will subtract mean and divide by SDev
pca <- prcomp(data[, -1], scale = TRUE)

# Create a data frame with PCA results
pca_data <- as.data.frame(pca$x[, 1:2])
pca_data$Label <- data[, 1]

# Display summary of PCA results
summary(pca)

biplot(pca, scale=0)

# Extract PC scores
str(pca)
pca$x
data2 <- cbind(data, pca$x[, 1:2])
head(data2)

# Extract variance explained by each principal component
variance_explained <- round(pca$sdev^2 / sum(pca$sdev^2) * 100, 2)

# Format variance explained to show 1 significant figure
variance_explained <- sprintf("%.1f", variance_explained)

# Create PCA plot using ggplot2
pca_plot <- ggplot(pca_data, aes(x = PC1, y = PC2, color = Label, fill = Label)) +
  geom_point(size = 5, shape = 16) +
  stat_ellipse(alpha = 0.2) + # Add ellipses
  labs(
    x = paste("PC1, (", variance_explained[1], "%)", sep = ""), # X-axis label
    y = paste("PC2, (", variance_explained[2], "%)", sep = ""), # Y-axis label
    color = expression("Genus"), # Set the legend title for the color aesthetic
    fill = expression("Genus") # Set the legend title for the fill aesthetic
  ) +
  guides(
    color = guide_legend(override.aes = list(shape = 16, size = 4)), #legend label shape and size
    fill = guide_legend(override.aes = list(shape = 16, size = 4)) #legend label shape and size
  ) +
  theme_minimal() +
  theme(
    legend.key.size = unit(0.7, "cm"), # Adjust the size of legend keys
    legend.text = element_text(size = 12, face = "italic"), # Adjust the size of legend text, and make it italic
    legend.title = element_text(size = 14), # Adjust the size of legend title
    plot.background = element_rect(fill = "white"), # Set plot background color

```

```

plot.title = element_text(size = 16, hjust = 0.5), # Adjust plot title size and center it
axis.text = element_text(size = 12), # Adjust the font size for axis tick labels
axis.title = element_text(size = 14), # Adjust the font size for axis labels
panel.grid.major = element_line(color = "gray", size = 0.5), # Add major gridlines
panel.grid.minor = element_blank(), # Remove minor gridlines
panel.border = element_rect(color = "black", fill = NA, size = 1) # Add black border
) +
ggtitle("") # Add a title to the plot

# Update the color palette from ColorBrewer
pca_plot <- pca_plot +
  scale_color_brewer(palette = "Set2") # Change the color palette to any set in ColorBrewer

pca_plot <- pca_plot +
  scale_fill_brewer(palette = "Set2") # Change the color palette for ellipses and legend

# Display the plot
print(pca_plot)

# Set output file name and save PCA plot as PDF or PNG image and change the size of the image
ggsave("File Name.png", plot = pca_plot, width = 10, height = 8, units = "in", dpi = 900)

```
